# Supplementary material for: Subjective Reasons for COVID-19 Vaccine Hesitancy and Sociodemographic Predictors of Vaccination in Nigeria: An Online Survey
Source: MDPI journal article supplement (doi:10.3390/covid2100097), 2022-09-25
Supplement: s1 [file s1]

Supplemental Table S1: Association between subjective reasons of covid-19 vaccine hesitancy and Covid-19 vaccine uptake (n=388).

| Variables      | Odds Ratio (95%CI) | P value |
|----------------|--------------------|---------|
| None           | Reference          |         |
| Fear           | 0.52 (0.17-1.58)   | 0.249   |
| *Afraid        |                    |         |
| Side-effects   | 0.42 (0.19-0.91)   | 0.028#  |
| *Rumours       |                    |         |
| Xenophobia     | 0.31 (0.03-2.89)   | 0.305   |
| Efficacy       | 0.29 (0.09-0.93)   | 0.038#  |
| Uncertainty    | 0.31 (0.03-2.89)   | 0.305   |
| Death          | 0.38 (0.14-1.01)   | 0.052   |
| Blood clots    | 0.25 (0.03-2.21)   | 0.213   |
| Infections     | 0.28 (0.06-1.35)   | 0.112   |
| Safety         | 0.50 (0.09-2.69)   | 0.420   |
| *Dangerous     |                    |         |
| Uncomfortable  | 1.25 (0.17-9.20)   | 0.827   |
| *Trust         |                    |         |
| *Politics      |                    |         |
| *Doubt         |                    |         |
| Fake           | 0.42 (0.04-4.13)   | 0.455   |
| Anxious        | 0.42 (0.04-4.13)   | 0.455   |
| *Don't believe |                    |         |
| *Terrifying    |                    |         |
| Others         | 0.38 (0.20-0.73)   | 0.003#  |

\*insufficient data, #significant, CI; Confidence Interval
